# Supplementary material
Source: publisher figshare collection journal article supplement (https://geolsoc.figshare.com/ndownloader/files/26290716)
Supplement: Supplementary file 1 [file 26290716]

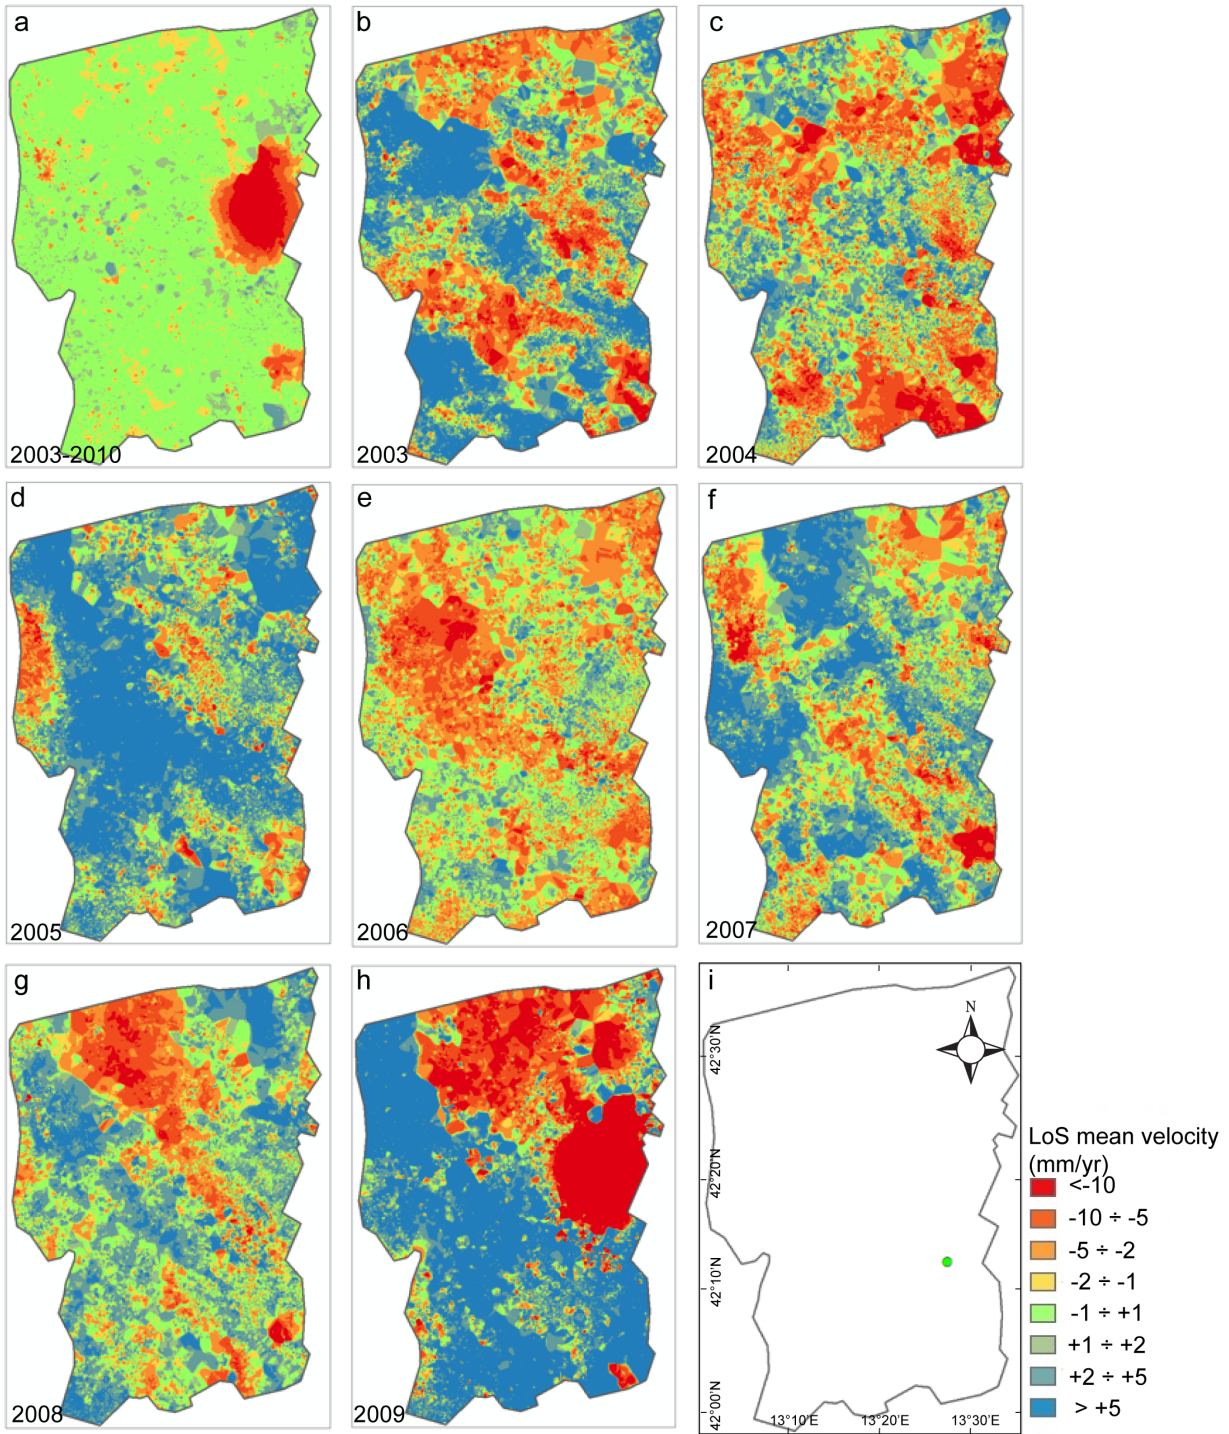

Figure S4. Maps of mean velocities obtained from PS datasets from the Envisat ascending orbit. a) Mean velocity from 2003 to 2010. Diagrams b to h: annual mean velocities from year 2003 to year 2009. Diagram i shows location of the reference point (green dot) for the Envisat ascending datasets.
